# Supplementary material
Source: publisher site journal article supplement (https://www.oncotarget.com/article/28625)
Supplement: Supplementary file 1 [file 28625]

## Addendum: EGFR endocytosis: more than meets the eye

**Aysegul Sapmaz<sup>1</sup> and Ayse Elif Erson-Bensan<sup>2</sup>**

<sup>1</sup>Department of Cell and Chemical Biology, Oncode Institute, Leiden University Medical Center, Einthovenweg 20, Leiden 2333 ZC, Netherlands

<sup>2</sup>Department of Biological Sciences, Middle East Technical University, Dumlupinar Blv No:1, Universiteler Mah., Cankaya, Ankara 06800, Türkiye

**Published:**

**Copyright:** © 2024 Sapmaz and Erson-Bensan. This is an open access article distributed under the terms of the [Creative Commons Attribution License](#) (CC BY 4.0), which permits unrestricted use, distribution, and reproduction in any medium, provided the original author and source are credited.

**This article has an addendum:** This article received a publication fee waiver.

Original article: Oncotarget. 2023; 14:297–301. <https://doi.org/10.18632/oncotarget.28400>
